# Supplementary material
Source: PubMed Central journal article supplement (PMC3135956)
Supplement: supp_pp.111.173047_173047SupplementalFigures_RevB.pdf [file supp_pp.111.173047_173047SupplementalFigures_RevB.pdf]

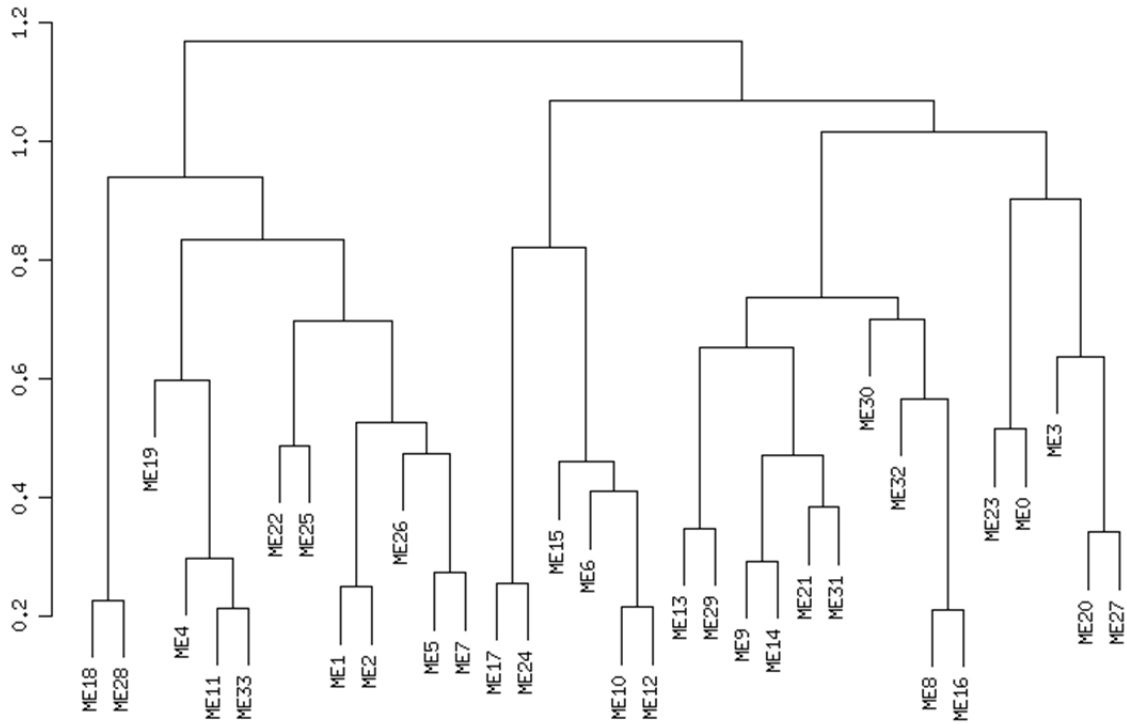

**Figure S1. Maize network module clustering.** The maize network consists of 34 modules which are shown in the dendrogram. Adjacent modules are more similar in expression than those more distant. Modules here are labeled with a prefix of ‘ME’. The dendrogram was constructed using the WGCNA package using eigenvectors derived from expression profiles of nodes in each module.

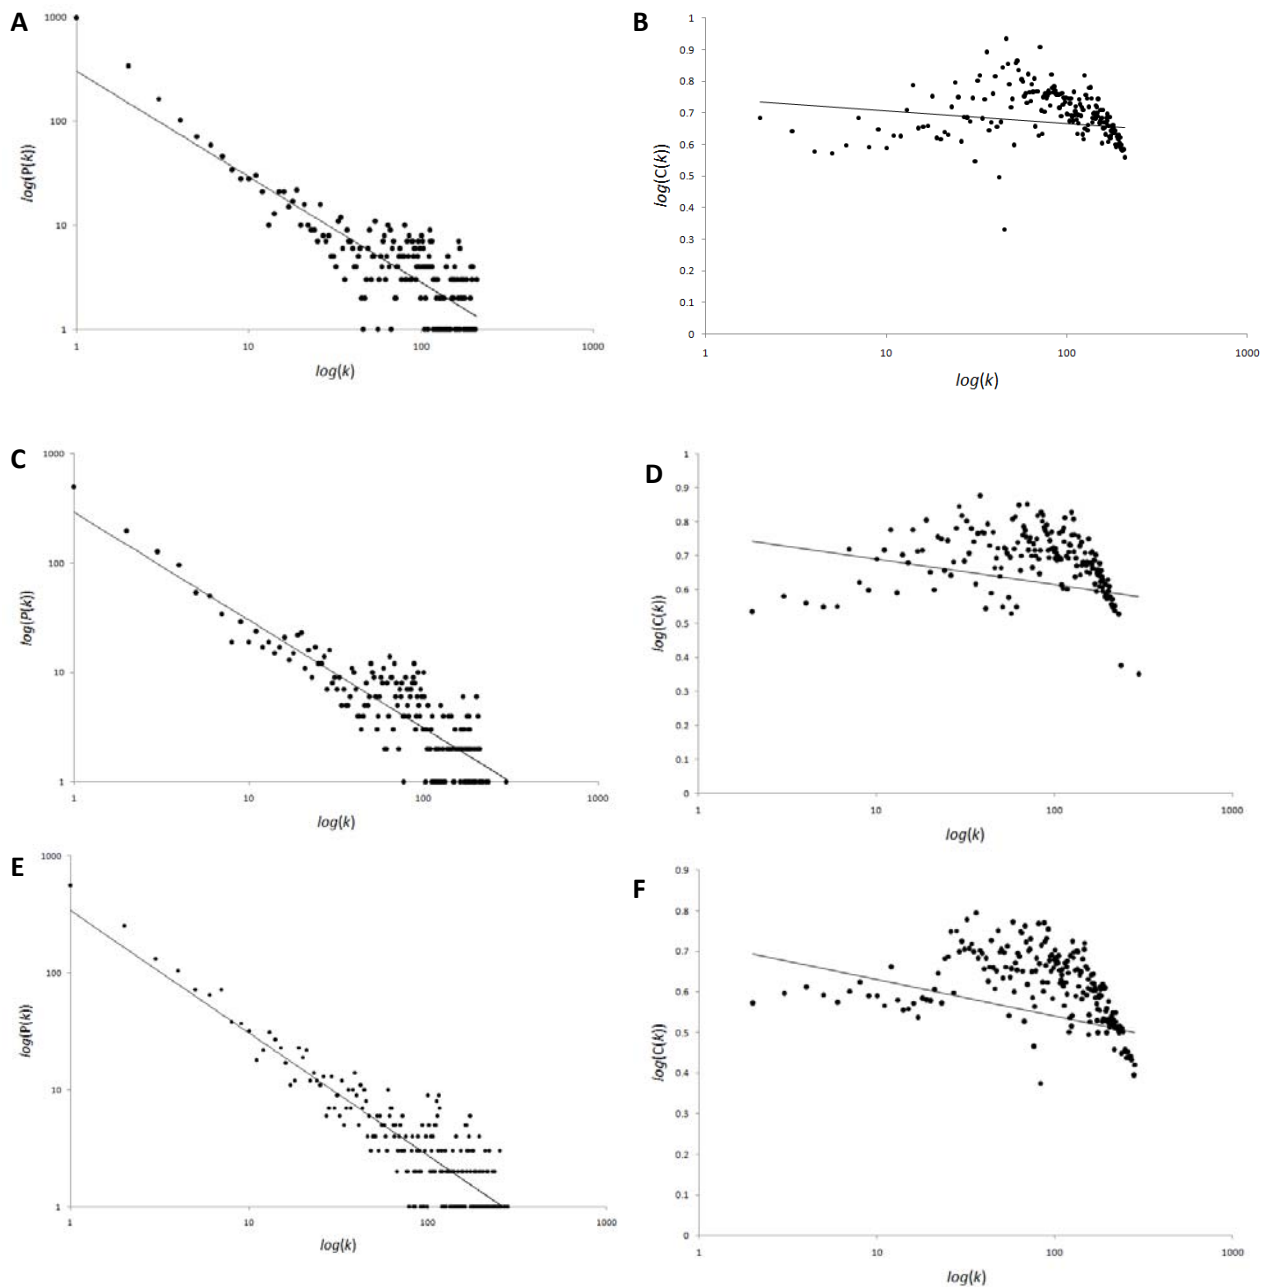

**Figure S2. Network characteristics.** A, The node degree distribution or scatter plot of edges,  $\log(k)$ , versus the probability of a node having  $k$  edges,  $P(k)$ , for the maize probeset-based network. B, The clustering coefficient distribution or scatter plot of  $k$  versus the average connectivity of any node having  $k$  edges,  $C(k)$  for the maize probeset-based network. C, The node-degree distribution for the maize locus-based network. D, The clustering-coefficient distribution for the maize locus-based network. E, The node degree distribution for the rice locus-based network. F, The clustering coefficient distribution for the rice locus-based network.
